# Supplementary material for: Toughening shape-memory epoxy resins via sacrificial hydrogen bonds
Source: Royal Society of Chemistry journal article supplement (doi:10.1039/d1py01625c), 2022-01-01
Supplement: d1py01625c1.pdf [file d1py01625c1.pdf]

## **Toughening Shape-Memory Epoxy Resins via Sacrificial Hydrogen Bond**

Yibo Shen, Baolong Wang, Da Li, Xirong Xu, Yingying Liu, Yudong Huang, and Zhen Hu\*

School of Chemistry and Chemical Engineering, MIIT Key Laboratory of Critical Materials Technology for New Energy Conversion and Storage, Harbin Institute of Technology, 92 West Dazhi Street, Nan Gang District, Harbin 150001, China.

Corresponding authors:

\*E-mail addresses: [huzhen@hit.edu.cn](mailto:huzhen@hit.edu.cn)

## Fracture Toughness Test

Fracture toughness tests were conducted to evaluate the brittleness of thermosets by notched three-point bending test. The size of resins was about 25 mm×5 mm×2.5 mm and the speed was set as 2 mm/min. According to the previous method,<sup>1</sup> the critical stress intensity factors ( $K_{IC}$ ) were calculated using the following equations:

$$x = \frac{a}{W} \quad \text{Equation (S1)}$$

$$f(x) = \frac{(2+x)(0.886 + 4.64x - 13.32x^2 + 14.72xx^3 - 5.6x^4)}{(1-x)^{3/2}} \quad \text{Equation (S2)}$$

$$K_{IC} = \frac{P_Q}{BW^{1/2}} f(x) \quad \text{Equation (S3)}$$

where  $a$  is the crack length ( $0.45 < \frac{a}{W} < 0.55$ ),  $P_Q$  is the maximum load,  $W$  and  $B$  are the width and thickness of the sample, respectively.

Table S1 The mole number of different samples.

| Samples  | Number of moles of epoxy group (mmol) | Number of moles of VU-HDE (mmol) |
|----------|---------------------------------------|----------------------------------|
| EP-V-1.0 | 25.50                                 | 4.46                             |
| EP-V-1.1 | 25.50                                 | 4.78                             |
| EP-V-1.2 | 25.50                                 | 5.10                             |
| EP-V-1.3 | 25.50                                 | 5.42                             |
| EP-V-1.4 | 25.50                                 | 5.74                             |
| EP-V-1.5 | 25.50                                 | 6.06                             |

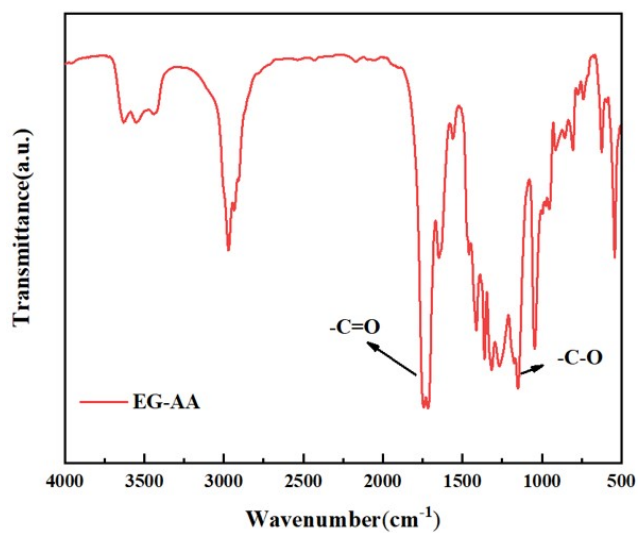

Figure S1. FT-IR of EG-AA.

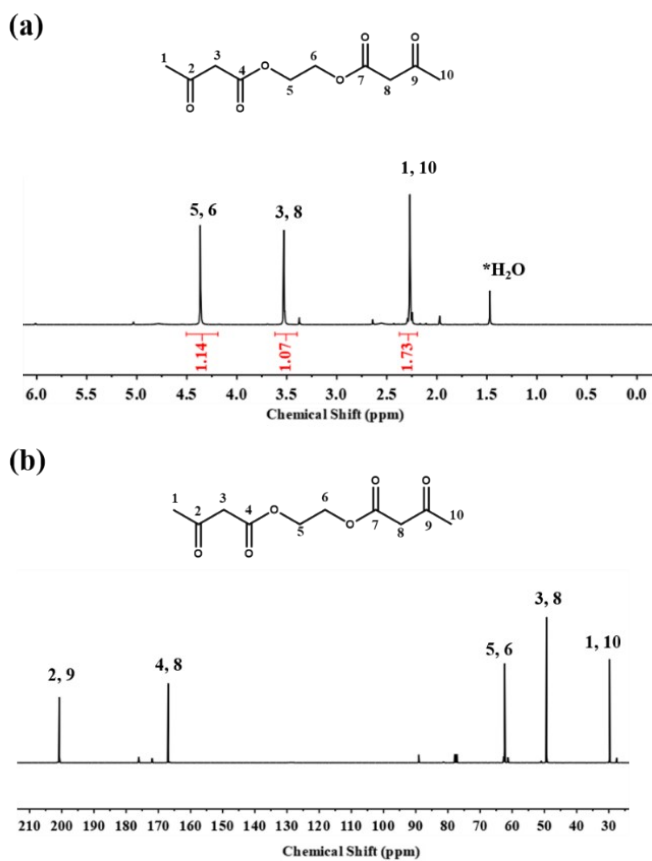

Figure S2. (a) <sup>1</sup>H NMR of EG-AA, (b) <sup>13</sup>C NMR of EG-AA.

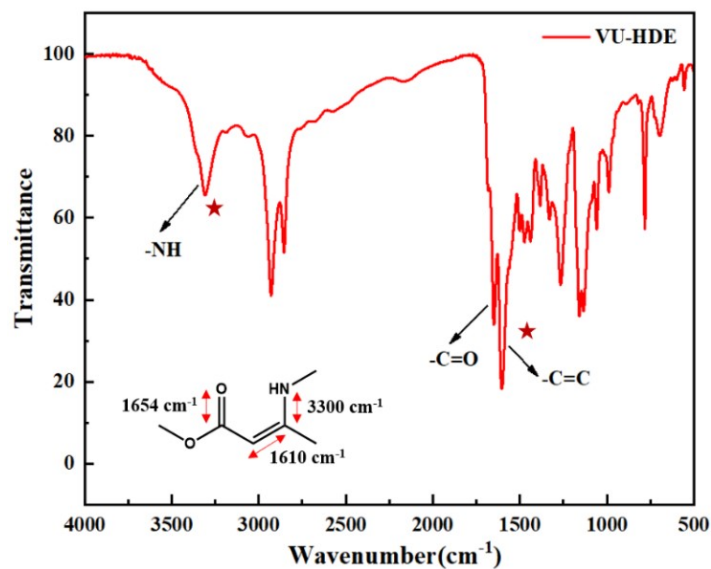

Figure S3. FT-IR of VU-HDE

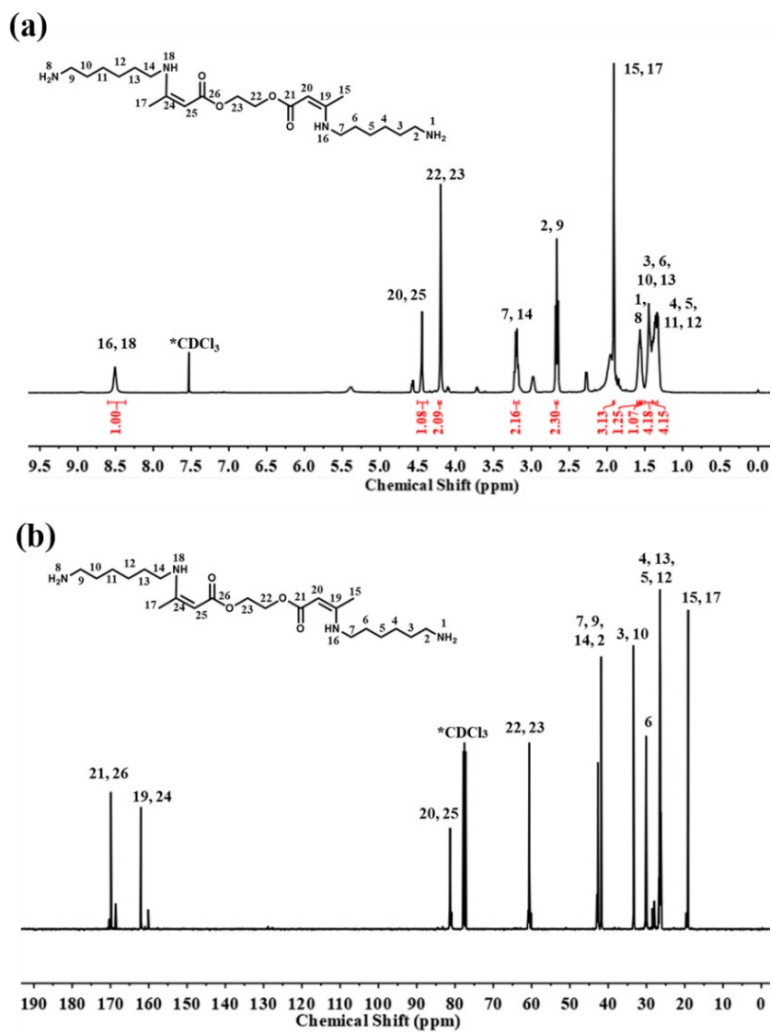

Figure S4. (a) <sup>1</sup>H NMR of VU-HDE, (b) <sup>13</sup>C NMR of VU-HDE.

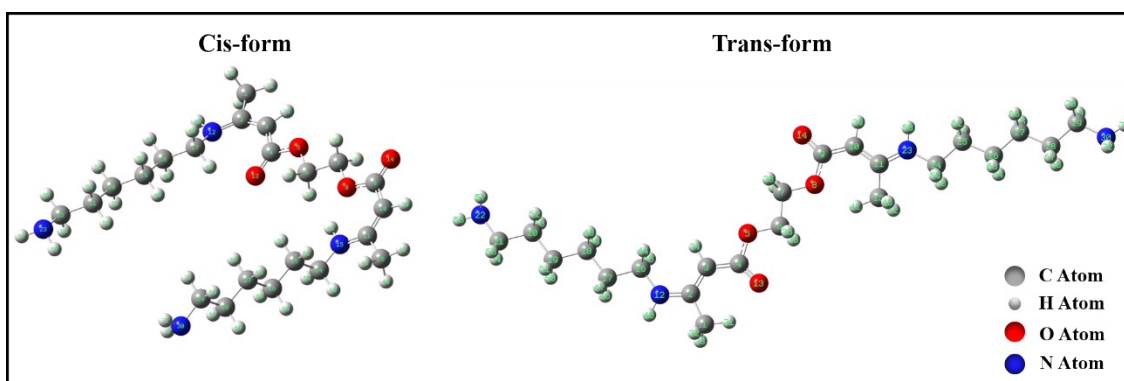

Figure S5 The geometric configuration features and atom positions of VU-HDE

Table S2 The geometric values for VU-HDE

| Type of the bond                 | Interatomic distance (Å) |            |
|----------------------------------|--------------------------|------------|
|                                  | Cis-form                 | Trans-form |
| C <sub>3</sub> -C <sub>4</sub>   | 1.45                     | 1.44       |
| C <sub>3</sub> -H <sub>34</sub>  | 1.08                     | 1.08       |
| C <sub>2</sub> -N <sub>12</sub>  | 1.37                     | 1.37       |
| C <sub>4</sub> -O <sub>5</sub>   | 1.37                     | 1.40       |
| C <sub>4</sub> =O <sub>13</sub>  | 1.22                     | 1.25       |
| N <sub>12</sub> -H <sub>40</sub> | 1.01                     | 1.00       |

The corner markers represent the positions of atoms.

The antisymmetric stretching vibration of C=O groups were reasonably decomposed into six Gaussian peaks according to methods that reported by previous work.<sup>2,3</sup>

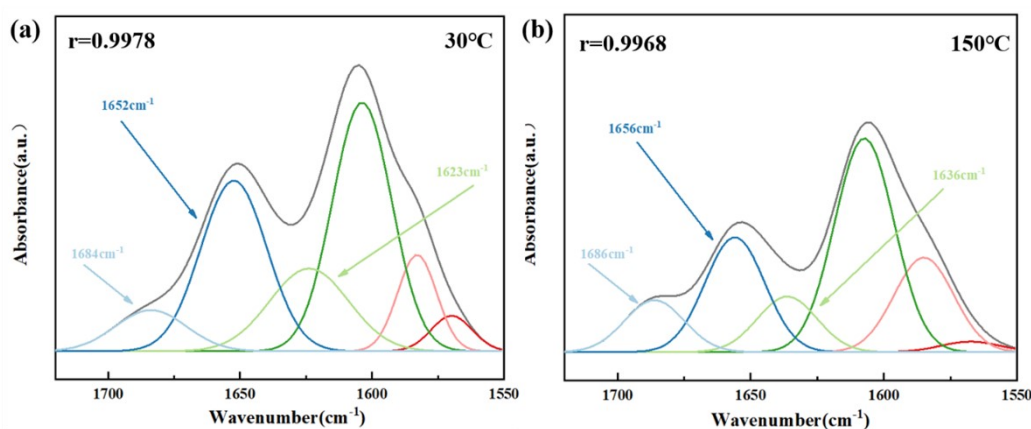

Figure

re S6. Infrared peak-splitting of FT-IR spectra under 30°C and 150°C for EP-V-1.3.

The degree of hydrogen bonding is calculated by the ratio of peak area according to Equation (S4). The results are showed in Table S2 and S3.

$$X_{B,CO\%} = \frac{A_{Ordered\ H-bond} + A_{Disordered\ H-bond}}{A_{Free\ -C=O} + A_{Ordered\ H-bond} + A_{Disordered\ H-bond}}$$

Equation (S4)

Table S3. Results of infrared peak-splitting of FT-IR spectra (30 °C) for EP-V-1.3

|                               | Free -C=O | Disordered H-bond | Ordered H-bond |
|-------------------------------|-----------|-------------------|----------------|
| Wavenumber(cm <sup>-1</sup> ) | 1684      | 1652              | 1623           |
| Anlytc aera                   | 2.48      | 9.58              | 5.57           |
| Aera%                         | 7.18      | 27.70             | 16.09          |
| X <sub>B,CO</sub> %           |           | 85.93%            |                |

Table S4. Results of infrared peak-splitting of FT-IR spectra (150 °C) for EP-V-1.3

|                               | Free -C=O | Disordered H-bond | Ordered H-bond |
|-------------------------------|-----------|-------------------|----------------|
| Wavenumber(cm <sup>-1</sup> ) | 1686      | 1656              | 1636           |
| Anlytc aera                   | 2.59      | 5.73              | 2.77           |
| Aera%                         | 9.60      | 21.22             | 10.21          |
| X <sub>B,CO</sub> %           |           | 76.65%            |                |

### Curing behaviors

The Kissinger equation was used to calculate the non-isothermal curing reaction process (Equation S4), where  $\beta$  is the heating rate during the DSC test (K/min),  $T_p$  is the peak temperature in curves(K),  $R$  is 8.314 J/(mol\*K). According to equation S7, we can obtain the number of activation energy (KJ/mol), which represents the degree of difficulty of curing reaction.<sup>4</sup>

$$\frac{d(\ln\beta/Tp^2)}{d(\frac{1}{Tp})} = -\frac{\Delta Ea}{R}$$

Equation (S4)

Table S5. The parameters of EP-V-1.3 curing reaction based on DSC

| $\beta$ /(K/min) | $T_p$ /K | $\ln[\beta \cdot T_p^{-2}/(K \cdot \text{min})^{-1}]$ | $1000 \cdot T_p^{-1}/K^{-1}$ |
|------------------|----------|-------------------------------------------------------|------------------------------|
| 5                | 363.02   | -10.1795                                              | 2.7547                       |
| 10               | 376.74   | -9.5605                                               | 2.6544                       |
| 15               | 384.78   | -9.1973                                               | 2.5989                       |

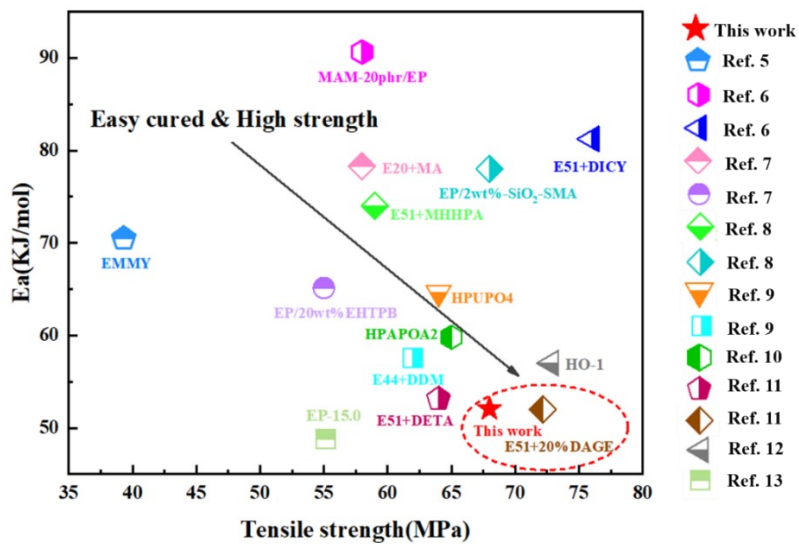

Figure S7. The activation energy and tensile strength of different epoxy resins (DGEBA) system.<sup>5-13</sup>

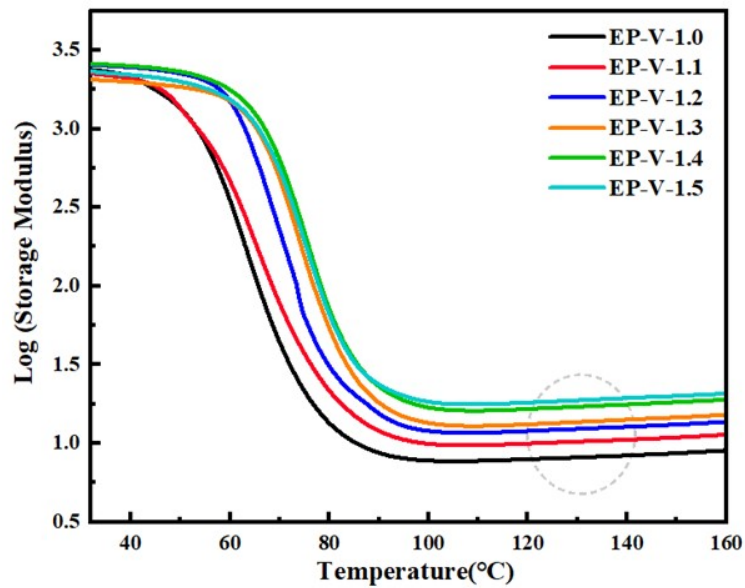

Figure S8. (a) The log axis of the storage modulus of different samples ( $T_g+60\text{ }^\circ\text{C}$ )

Table S6. Glass transition temperature ( $T_g$ ), storage modulus at  $T_g + 60\text{ }^\circ\text{C}$  and  $\nu_e$  of six samples

|          | $T_g\text{ (}^\circ\text{C)}$ | $T_g+60\text{ (}^\circ\text{C)}$ | Storage modulus (MPa) | $\nu_e\text{ (mol}\cdot\text{m}^{-3}\text{)}$ |
|----------|-------------------------------|----------------------------------|-----------------------|-----------------------------------------------|
| EP-V-1.0 | 67.39                         | 127.39                           | 8.08                  | 809.08                                        |
| EP-V-1.1 | 68.86                         | 128.86                           | 10.23                 | 1019.90                                       |
| EP-V-1.2 | 74.03                         | 134.03                           | 12.53                 | 1233.82                                       |
| EP-V-1.3 | 77.40                         | 137.40                           | 14.02                 | 1369.76                                       |
| EP-V-1.4 | 78.24                         | 138.24                           | 17.59                 | 1714.52                                       |
| EP-V-1.5 | 78.39                         | 138.39                           | 19.31                 | 1881.41                                       |

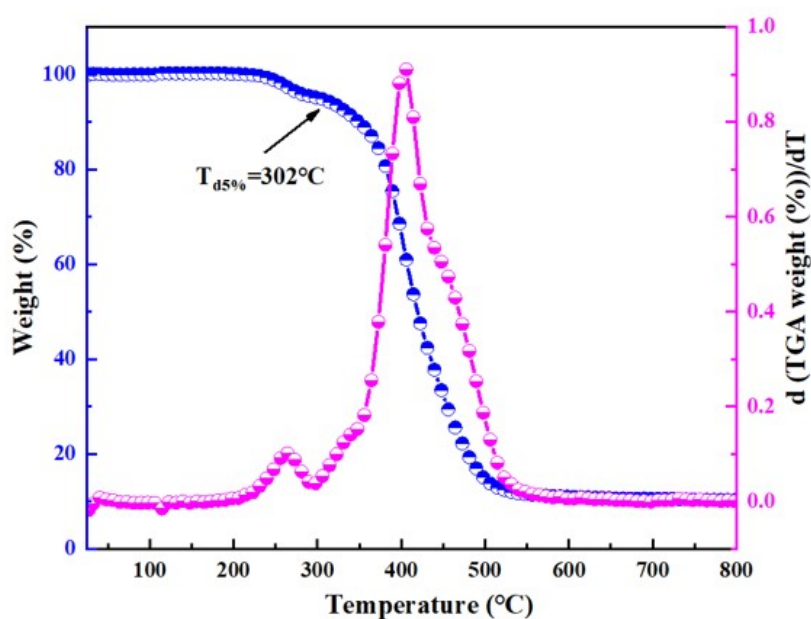

Figure S9. (a) TGA curves of EP-V-1.3

Table S7. Mass change of EP-V-1.3 in water, acid and base solution after 7 days.

| Solution                       | Concentration(mol/L) | Mass change (+%) |
|--------------------------------|----------------------|------------------|
| H <sub>2</sub> O               | -                    | 0.60             |
|                                | 0.01                 | 1.09             |
|                                | 0.1                  | 11.7             |
| HCl                            | 1                    | 24.86            |
|                                | 2                    | 23.10            |
|                                | 6                    | 77.62            |
|                                | 0.01                 | 1.07             |
| H <sub>2</sub> SO <sub>4</sub> | 0.1                  | 5.33             |
|                                | 1                    | 20.60            |
|                                | 2                    | 25.77            |



|      |      |       |
|------|------|-------|
|      | 6    | 22.94 |
| NaOH | 0.01 | 0.82  |
|      | 0.1  | 0.43  |
|      | 1    | 1.20  |
|      | 2    | 0.39  |
|      | 6    | 0.32  |

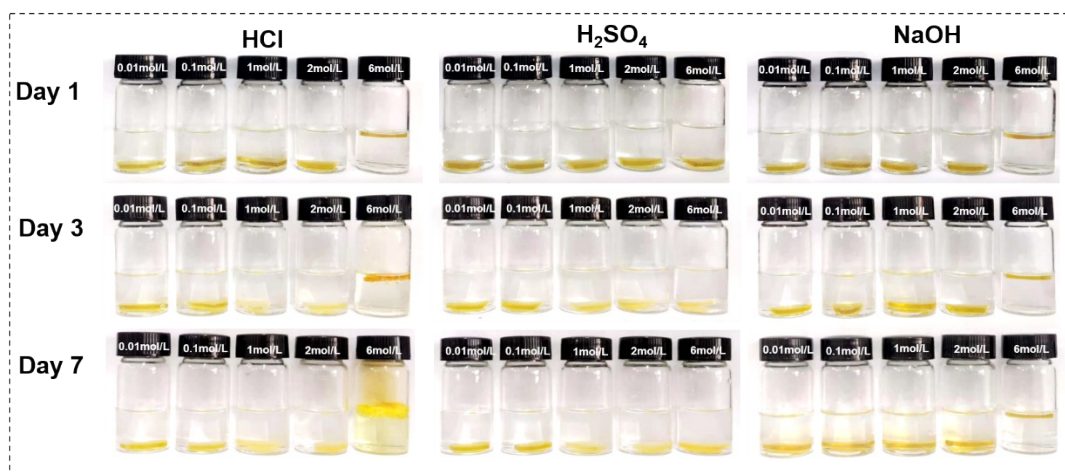

Figure S10. Digital photos of acid-base resistance property of EP-V-1.3

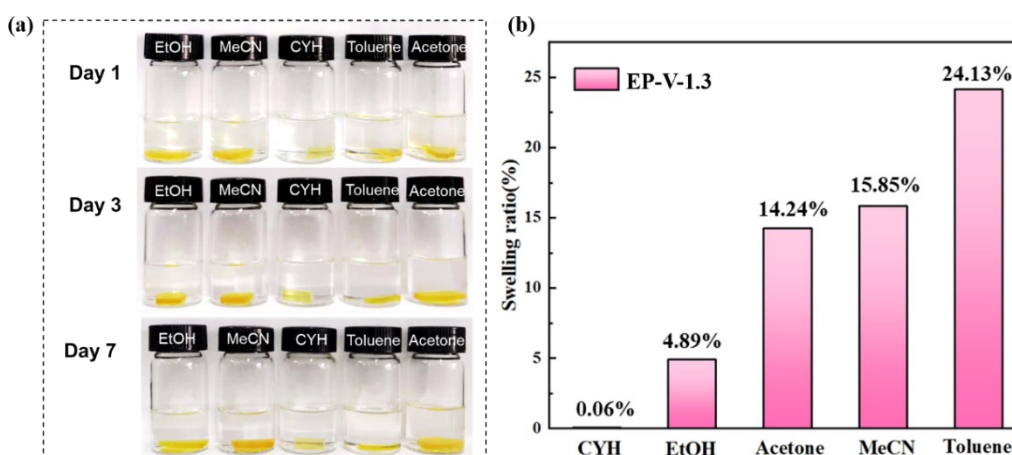

Figure S11. (a) Digital photos of solvent resistance of EP-V-1.3(1 day, 3 day, 7 day), (b) swelling ratio of EP-V-1.3 in different solvents (the swelling ratio of prepared resin are determined by comparison of weights of the resin before and after soaking in organic solvents).

#### REFERENCES (SUPPORTING INFORMATION) :

(1) H.-S. Jung, Y. Park, C.-W. Nah, J.-C. Lee, K.-Y. Kim and C. S. Lee, *Fibers and*

*Polymers*, 2021, **22**, 184-195

(2) M. Liu, J. Zhong, Z. Li, J. Rong, K. Yang, J. Zhou, L. Shen, F. Gao, X. Huang and H. He, *European Polymer Journal*, 2020, **124**, 109475.

(3) S. Wang, N. Teng, J. Dai, J. Liu, L. Cao, W. Zhao and X. Liu, *Polymer*, 2020, **210**, 13004.

(4) J. S. Santhosh Jeferson Stanleya, S. Ananda Kumarb, M. Ariramanc, M. Mandhakini, *Progress in Organic Coatings*, 2021, **150**, 105896.

(5) X. Yang, M. Guo, X. Wang, W. Huan and M. Li, *ACS Omega*, 2020, **5**, 28918-28928.

(6) L. Tao, Z. Sun, W. Min, H. Ou, L. Qi and M. Yu, *RSC Advances*, 2020, **10**, 1603-1612.

(7) J. Yang, X. He, H. Wang, X. Liu, P. Lin, S. Yang and S. Fu, *Journal of Applied Polymer Science*, 2019, **137**, 48596.

(8) W. Wei, Y. Zhao, B. Zhang, Y. Cui, X. Li, X. Fei and X. Liu, *Journal of Applied Polymer Science*, 2020, **137**, 48986.

(9) C. Ma, S. Qiu, J. Wang, H. Sheng, Y. Zhang, W. Hu and Y. Hu, *Polymer Degradation and Stability*, 2018, **154**, 157-169.

(10) C. Ma, S. Qiu, B. Yu, J. Wang, C. Wang, W. Zeng and Y. Hu, *Chemical Engineering Journal*, 2017, **322**, 618-631.

(11) M. Yu, Q. Fu, T. Zhang, Y. Chen, J. Tan, Y. Zhou and X. Zhu, *Thermochimica Acta*, 2021, **699**, 178910.

(12) P. Y. Kuo, L. A. Barros, N. Yan, M. Sain, Y. Qing and Y. Wu, *Carbohydr Polym*, 2017, **177**, 249-257.

(13) X.-F. Liu, X. Luo, B.-W. Liu, H.-Y. Zhong, D.-M. Guo, R. Yang, L. Chen and Y.-Z. Wang, *ACS Applied Polymer Materials*, 2019, **1**, 2291-2301.
